# Supplementary material for: Towards risk-based flood management in highly productive paddy rice cultivation – concept development and application to the Mekong Delta
Source: Copernicus journal article supplement (doi:10.5194/nhess-2018-223), 2018-08-06
Supplement: Supplementary file [file nhess-2018-223-AC1-supplement.pdf]

## Response to Editor's Comments from Ass. Prof. Dhruvesh Patel on

### “Towards risk-based flood management in highly productive paddy rice cultivation – concept development and application to the Mekong Delta”

by Nguyen Van Khanh Triet, Nguyen Viet Dung, Bruno Merz and Heiko Apel

**Editor's comments:** Thanks for submission of your manuscript entitled “Towards risk-based flood management in highly productive paddy rice cultivation – concept development and application to the Mekong Delta” Paper is relevant to the scope of the special issue and it is well written. I have observed some minor correction which improves the quality of work. 1) Fig.1, Geographical location of the Mekong Basin (Left Panel), observed the north arrow is missing. In addition, provide common scale bar and Graticule grid frame (Degree Minute Second) to both the panels. 2) Fig. 5, (B), provide the north arrow 3) Fig. 11, Provide the common scale bar to Fig A,B, C.

**Authors' reponse:** We would like to thank the editor for the positive comments and suggestions towards improving our manuscript. We will incorporate your suggestions to Fig. 1, Fig.5 and Fig.11 in the revised manuscript as shown in the figures below.

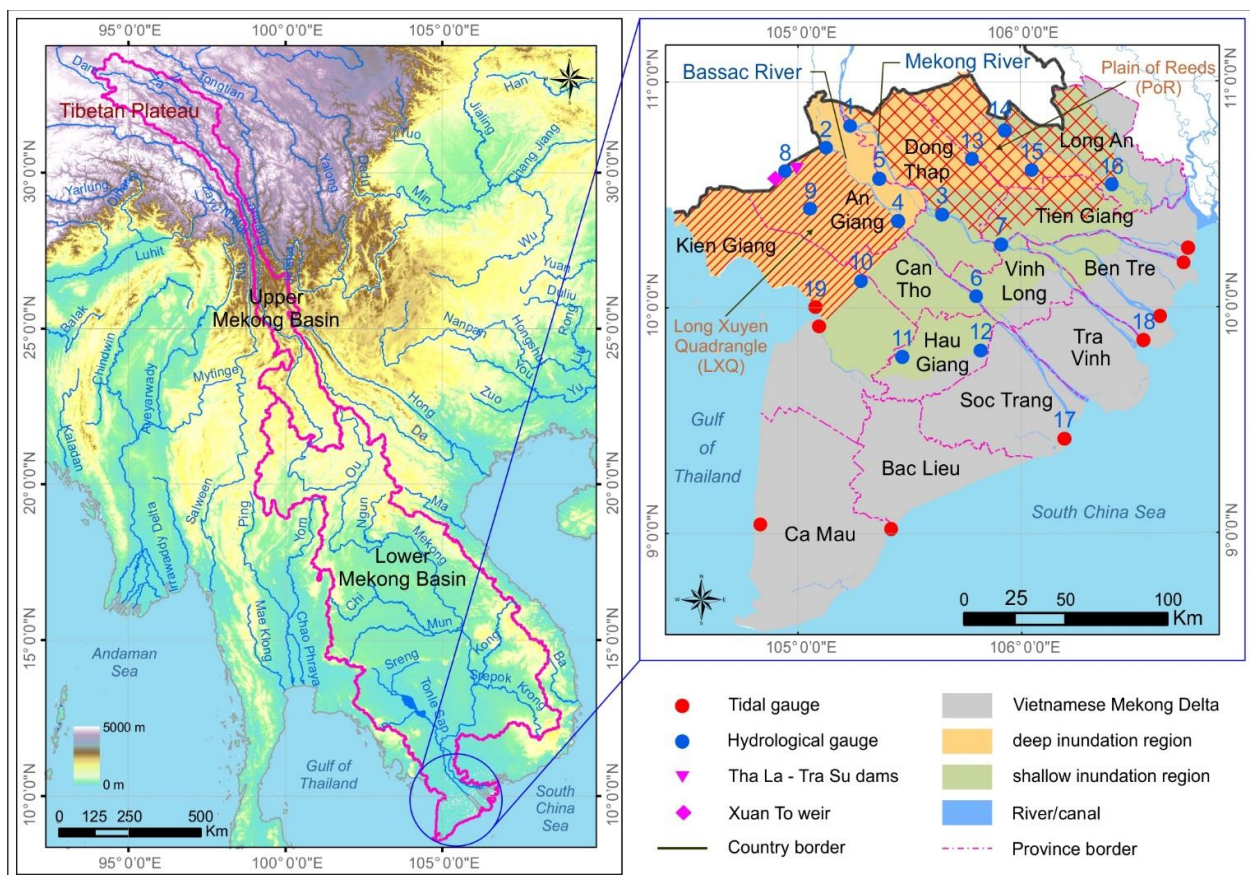

**Figure 1.** Geographical location of the Mekong Basin (left panel). The Vietnamese Mekong Delta and its flood prone area (right panel). Deep inundation region (above 1.5 meter) marked in yellow, shallow inundation region (below 1.5 meter) presented in

green colour. Red dots are locations of tidal gauges. Blue dots are locations of water level gauges. The numbers above blue/ red dots present station codes.

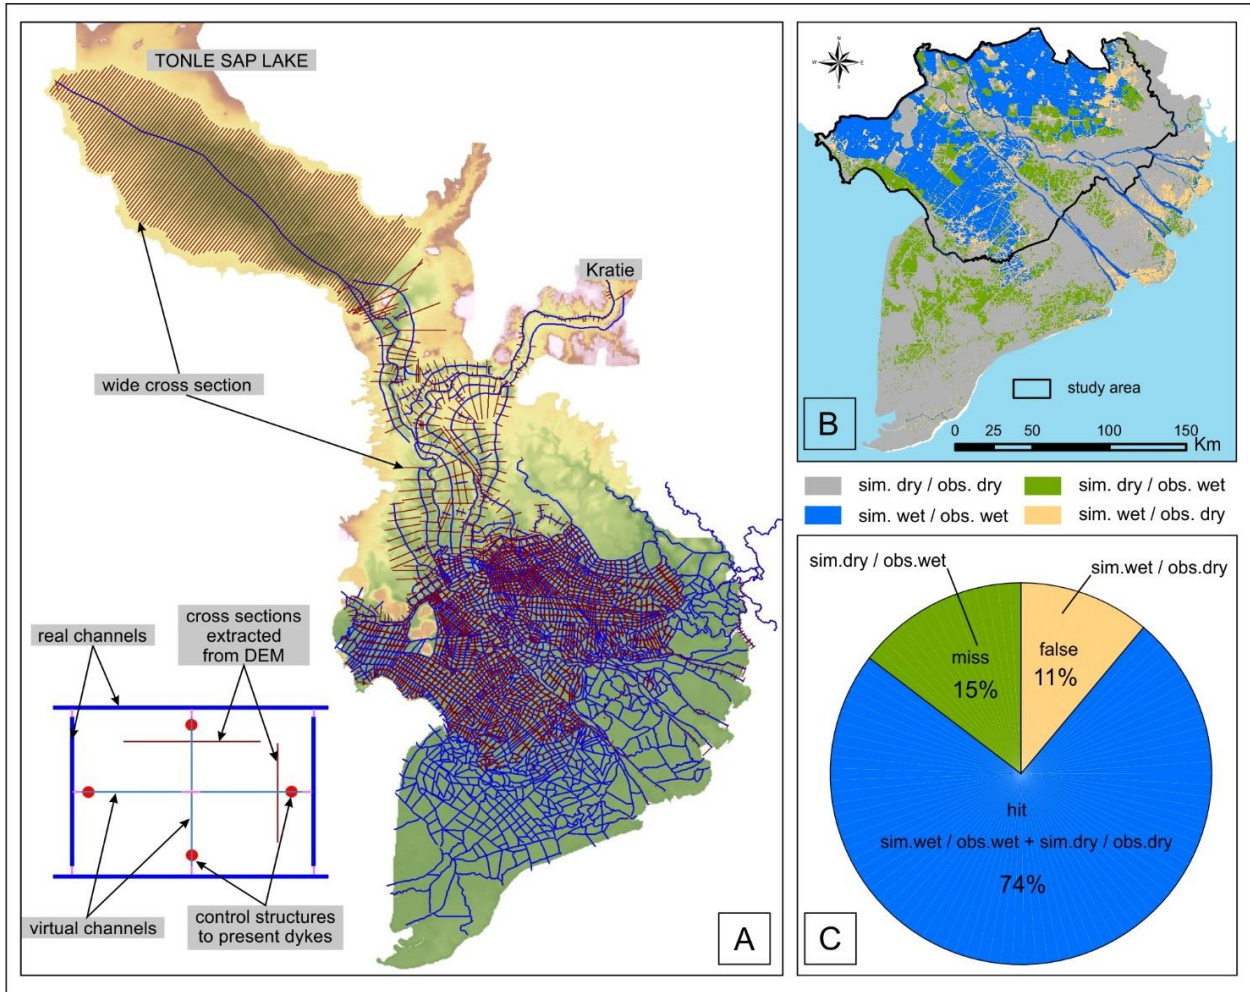

**Figure 5.** (A) Schematization of the quasi-2D flood propagation model for the Mekong Delta, and the concept of simulation of compartmented floodplains in the VMD. Comparison of observed inundation extent derived from satellite data and simulated maximum inundation extent for the flood event in 2011 for the whole delta (B), and evaluation of inundation simulation (C) adapted from Triet et al. (2017).

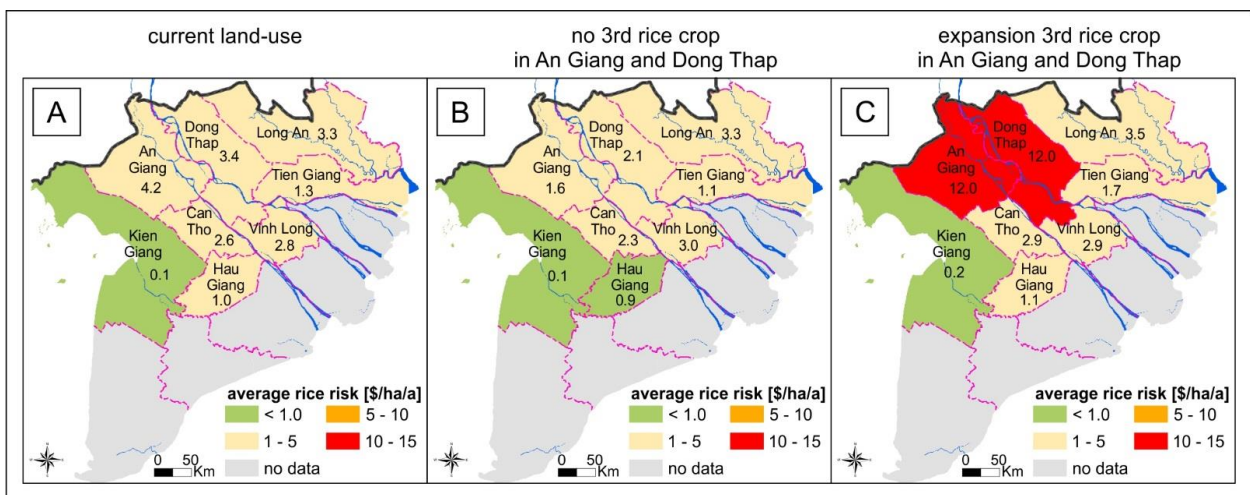

**Figure 11.** Flood risk for rice crops in the Vietnamese Mekong Delta. Specific loss is calculated in US\$/ha/a for three land-use scenarios (A) current land-use, (B) no Autumn-Winter crop (AWC) in An Giang and Dong Thap, and (C) expansion of the AWC in these two provinces.
