# Supplementary material for: Towards risk-based flood management in highly productive paddy rice cultivation – concept development and application to the Mekong Delta
Source: Copernicus journal article supplement (doi:10.5194/nhess-2018-223), 2018-08-06
Supplement: Supplementary file [file nhess-2018-223-AC4-supplement.pdf]

## Response to third Referee's Comments on

### “Towards risk-based flood management in highly productive paddy rice cultivation – concept development and application to the Mekong Delta”

by Nguyen Van Khanh Triet, Nguyen Viet Dung, Bruno Merz and Heiko Apel

#### **Referee's comments:**

*This paper quantifies flood risk to paddy rice in the Mekong delta. The methodological contribution is the consideration of cropping calendar and plant phenology in combination with synthetic probabilistic flood hydrographs, such that the plant phenology and temporal occurrence of flood peaks is introduced into the probabilistic flood risk assessment approach. The authors showed that timing of floods, the high tides and the cropping calendar are crucial factors for agricultural crop damage. And the authors make several suggestions to support flood management in the region. I think the paper is in general well written (see some technical corrections; e.g. space after ';''), and the work is worth to be published.*

*And I am looking forward to see the next research of the authors in the directions they suggest in section 4.5.*

*Lastly, in case the Editor asked a reviewed version of the manuscript, I am happy to review the revised version.*

**Authors' response:** We would like to thank the reviewer for the positive comments. Thank you for pointing out the issue with space after “;”. We believe this occurs mostly between multiple citations, because we used the default template of Hydro-Earth Sys Sci. We will correct this issue in the revised manuscript.
